# Supplementary material for: Rearrangement of lithiated S-alkyl O,O-dialkyl thiophosphates: Scope and stereochemistry of the thiophosphate–mercaptophosphonate rearrangement
Source: Royal Society of Chemistry journal article supplement (doi:10.1039/c1ob05246b), 2011-01-01
Supplement: c1ob05246b.pdf [file c1ob05246b.pdf]

### Data of 18d

$\delta_{\text{H}}$  (250.1 MHz) 0.96 (d,  $J$  6.2, 3H), 1.27 (d,  $J$  6.2, 3H), 1.34 (d,  $J$  6.2, 3H), 1.37 (d,  $J$  6.2, 3H), 2.64 (dd,  $J$  8.2, 11.0, SH), 4.03 (dd,  $J$  8.2, 19.0, 1H), 4.52 (dsept,  $J$  6.2, 7.3, 1H), 4.79 (dsept,  $J$  6.2, 7.3, 1H), 7.39 (m, 5H);  $\delta_{\text{C}}$  (100.6 MHz) 23.1 (d,  $J$  6.1), 23.79 (d,  $J$  5.4), 24.1 (d,  $J$  3.1), 24.2 (d,  $J$  3.1), 39.1 (d,  $J$  149.2), 71.9 (d,  $J$  7.7), 72.3 (d,  $J$  6.9), 127.8 (d,  $J$  3.1), 128.5 (d,  $J$  1.5, 2C), 128.9 (d,  $J$  6.1, 2C), 136.9 (d,  $J$  3.8);  $\delta_{\text{P}}$  (162 MHz) 22.3; IR (Si):  $\nu_{\text{max}}$  2979, 2932, 1453, 1385, 1251, 1178, 1105, 987  $\text{cm}^{-1}$ ;  $\text{C}_{13}\text{H}_{21}\text{O}_3\text{PS}$  (288.35): calcd. C 54.15, H 7.34; found: C 54.20, H 7.41.
